# Supplementary material for: Spaceborne tropospheric nitrogen dioxide (NO 2 ) observations from 2005–2020 over the Yangtze River Delta (YRD), China: variabilities, implications, and drivers
Source: Copernicus journal article supplement (doi:10.5194/acp-22-4167-2022), 2022-03-31
Supplement: Supplementary file 1 [file acp-22-4167-2022-supplement.pdf]

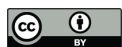

*Supplement of*

**Spaceborne tropospheric nitrogen dioxide (NO<sub>2</sub>) observations from 2005–2020 over the Yangtze River Delta (YRD), China: variabilities, implications, and drivers**

**Hao Yin et al.**

*Correspondence to:* Youwen Sun (ywsun@aiofm.ac.cn) and Cheng Liu (chliu81@ustc.edu.cn)

The copyright of individual parts of the supplement might differ from the article licence.

**Table S1.** The number of cities, area of the region and population for each province (Zhejiang, Anhui and Jiangsu Province) of YRD region.

| Province | Number of cities | Area (ten thousand square kilometers) | Population (million) |
|----------|------------------|---------------------------------------|----------------------|
| Zhejiang | 11               | 10.55                                 | 65.40                |
| Anhui    | 16               | 14.01                                 | 61.03                |
| Jiangsu  | 13               | 10.72                                 | 84.75                |

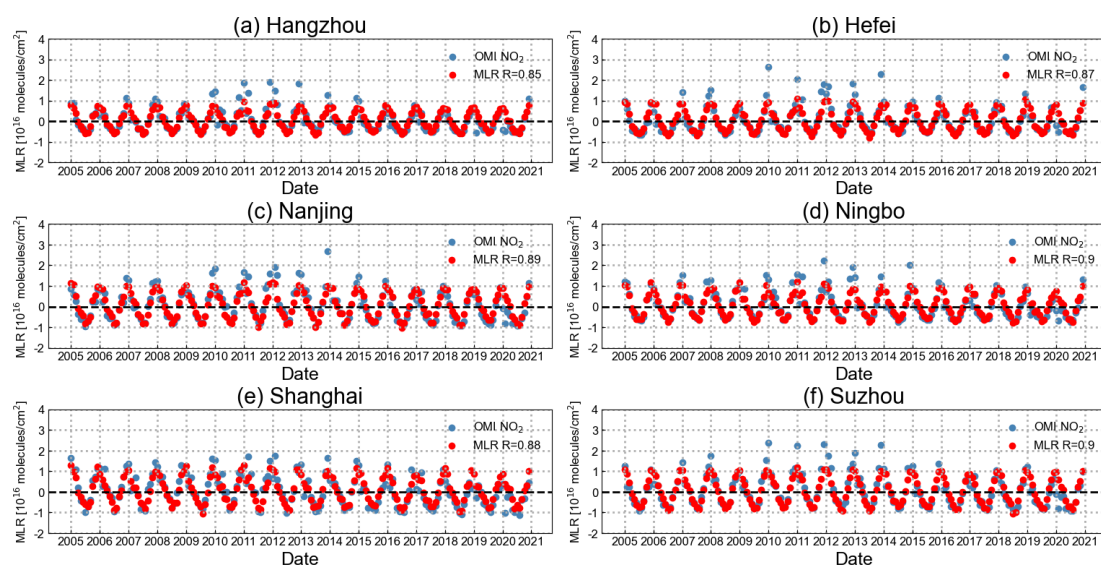

**Figure S1.** The comparisons of time series of monthly averaged OMI tropospheric  $\text{NO}_2$  VCDs (blue dots) and the MLR model (red dots) from 2005 to 2020 over the 6 megacities within the YRD.

## Meteorological Parameters for Tropospheric NO<sub>2</sub>

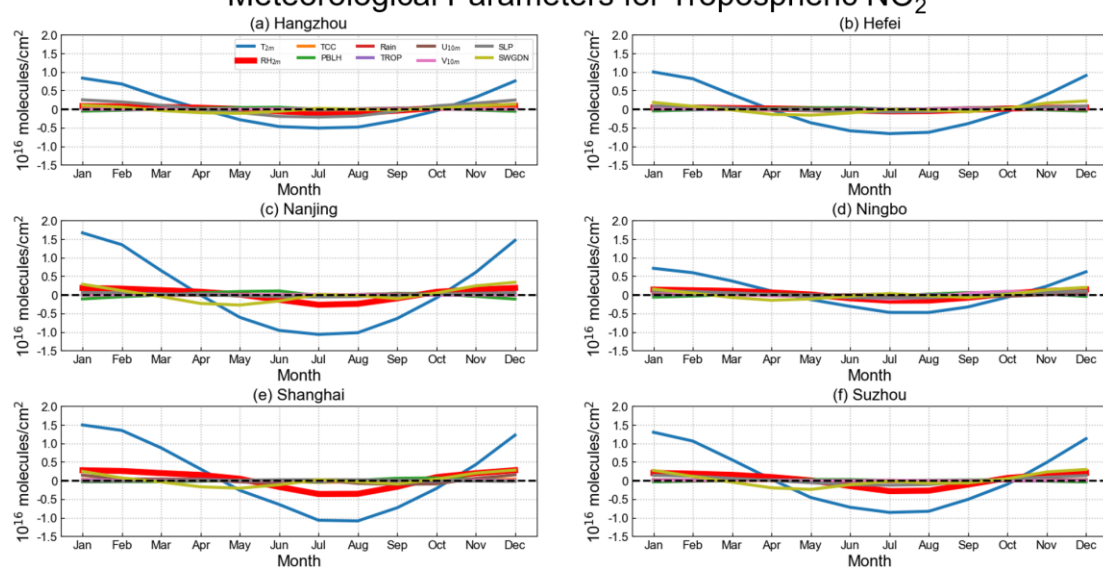

**Figure S2.** The contributions of each meteorological parameter to the month variations of tropospheric NO<sub>2</sub> VCDs over each YRD city.

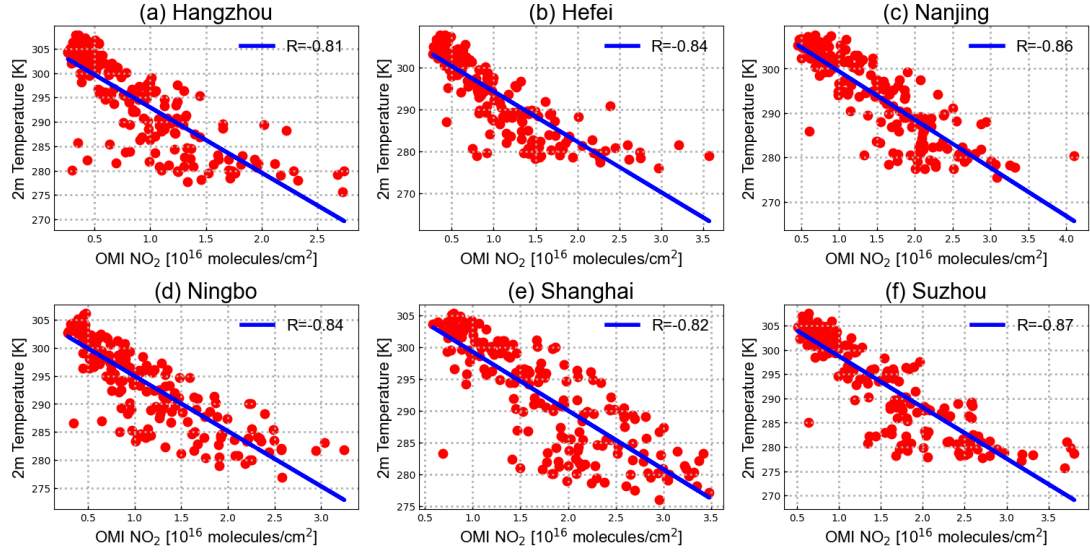

**Figure S3.** The correlations between monthly average of temperature and tropospheric NO<sub>2</sub> VCDs.

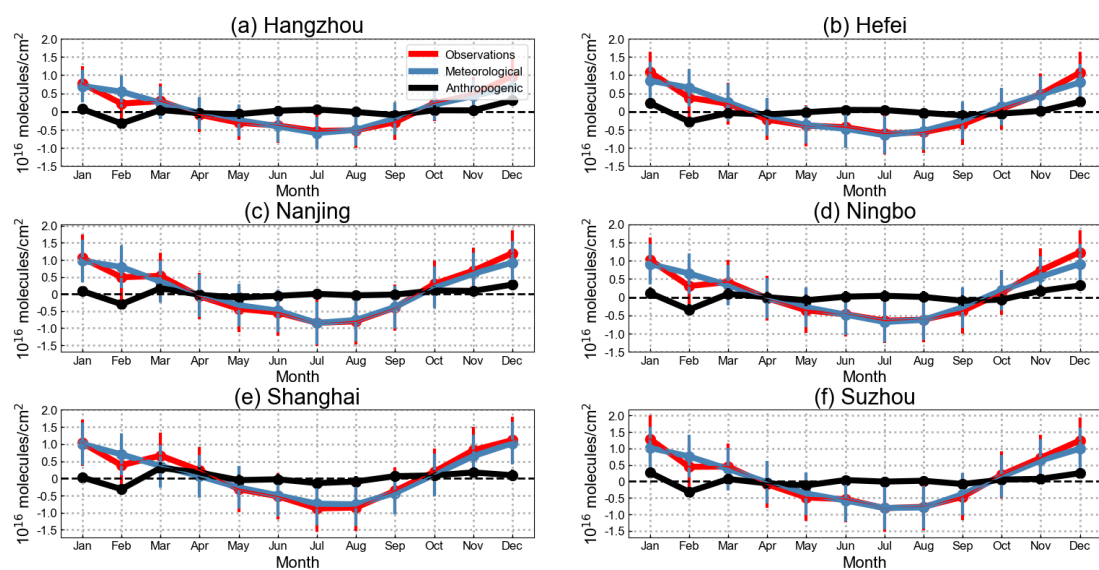

**Figure S4.** The monthly average of tropospheric NO<sub>2</sub> VCDs and its effect by only meteorological drivers and related anthropogenic drivers in main cities over YRD during 2005-2019.

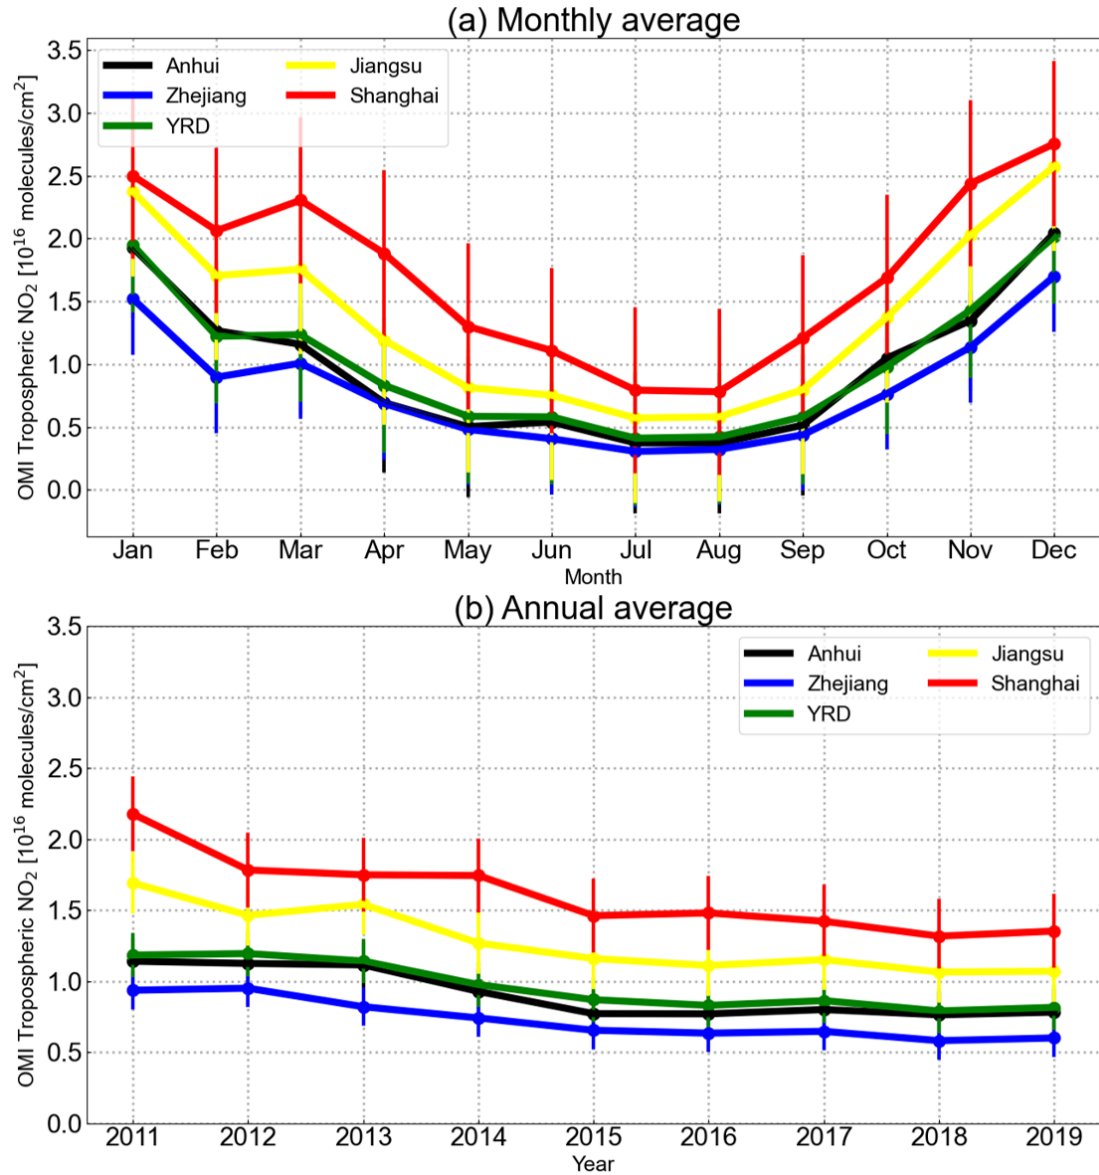

**Figure S5.** (a) Monthly averaged tropospheric NO<sub>2</sub> VCDs over the whole YRD region (green dots and lines), Anhui Province (black dots and lines), Zhejiang Province (blue dots and lines), and Jiangsu Province (yellow dots and lines) during 2011 to 2019. (b) Same as (a) but for annual average. The vertical error bar is  $1\sigma$  standard variation (STD) within that month or year.

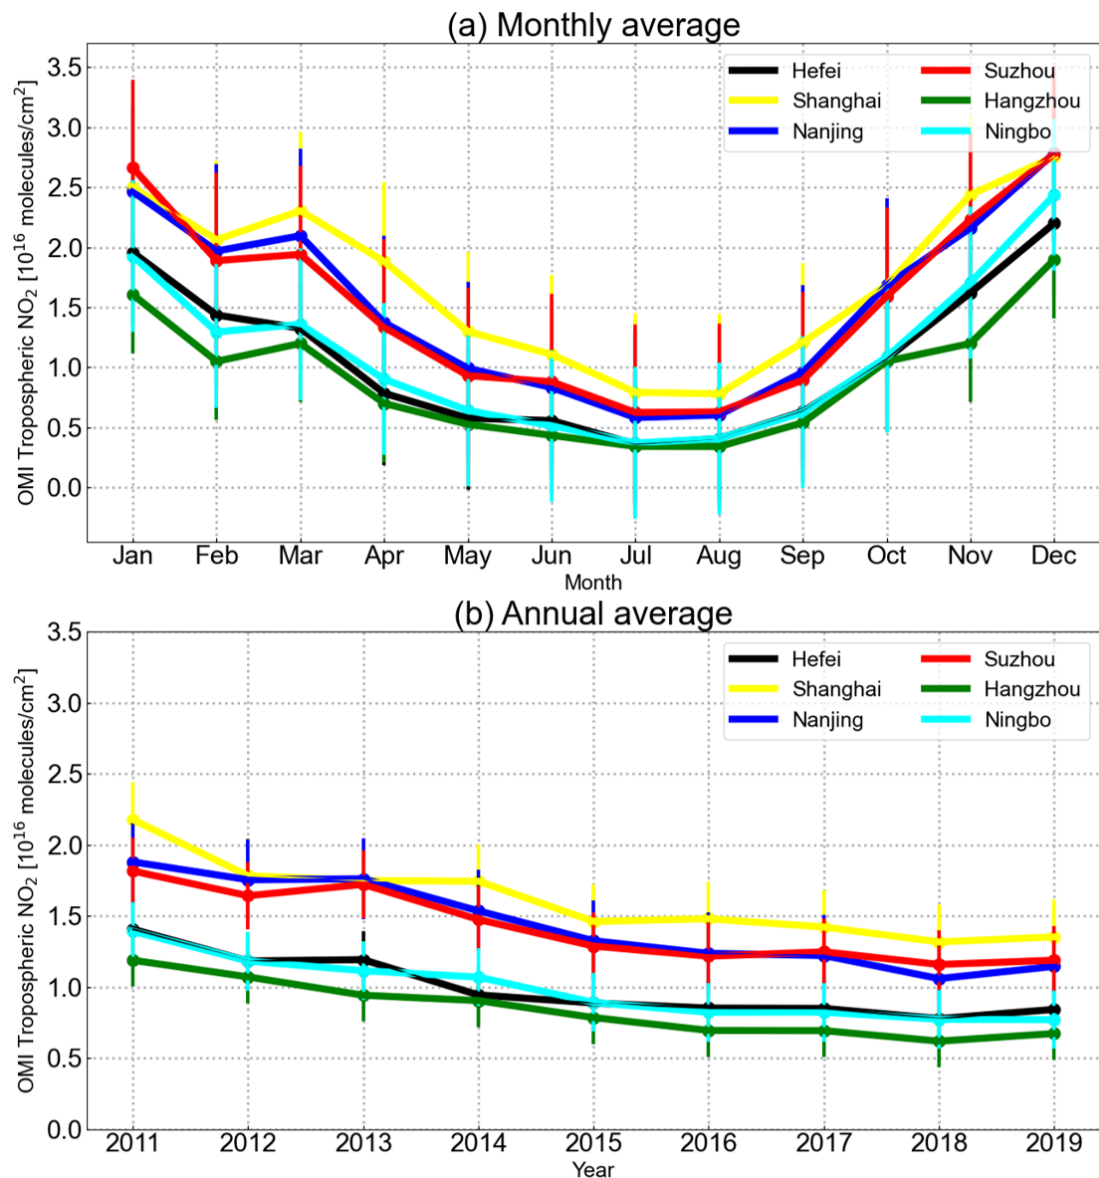

**Figure S6.** (a) Annual averaged tropospheric NO<sub>2</sub> VCDs over the whole YRD region (green dots and lines), Anhui Province (black dots and lines), Zhejiang Province (blue dots and lines), and Jiangsu Province (yellow dots and lines) during 2011 to 2019. (b) Same as (a) but for annual average. The vertical error bar is 1 $\sigma$  standard variation (STD) within that month or year.



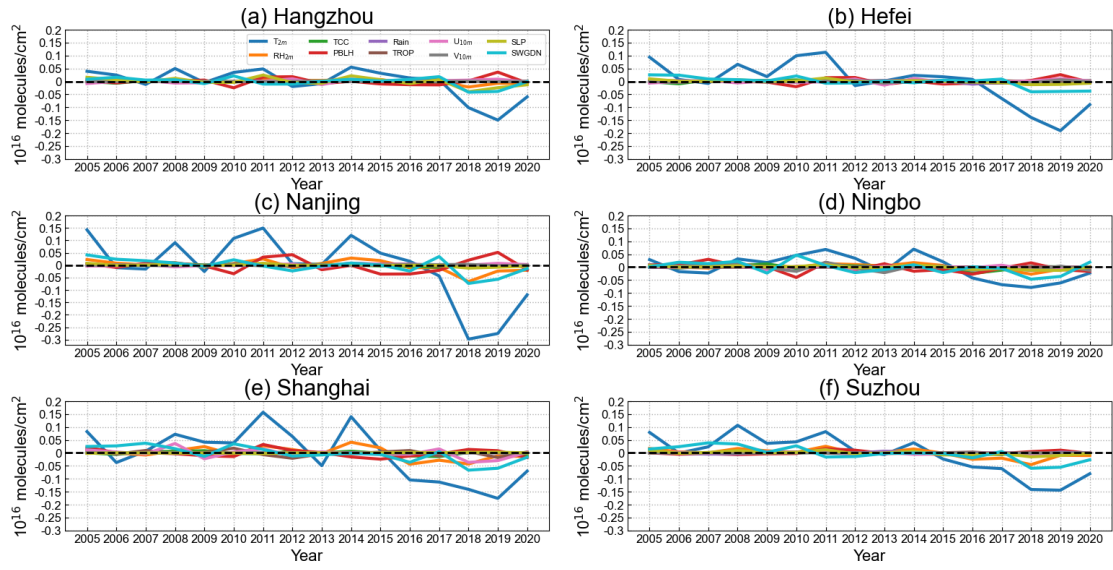

**Figure S7.** The contributions of each meteorological parameter to the annual variations of tropospheric NO<sub>2</sub> VCDs over each YRD city.

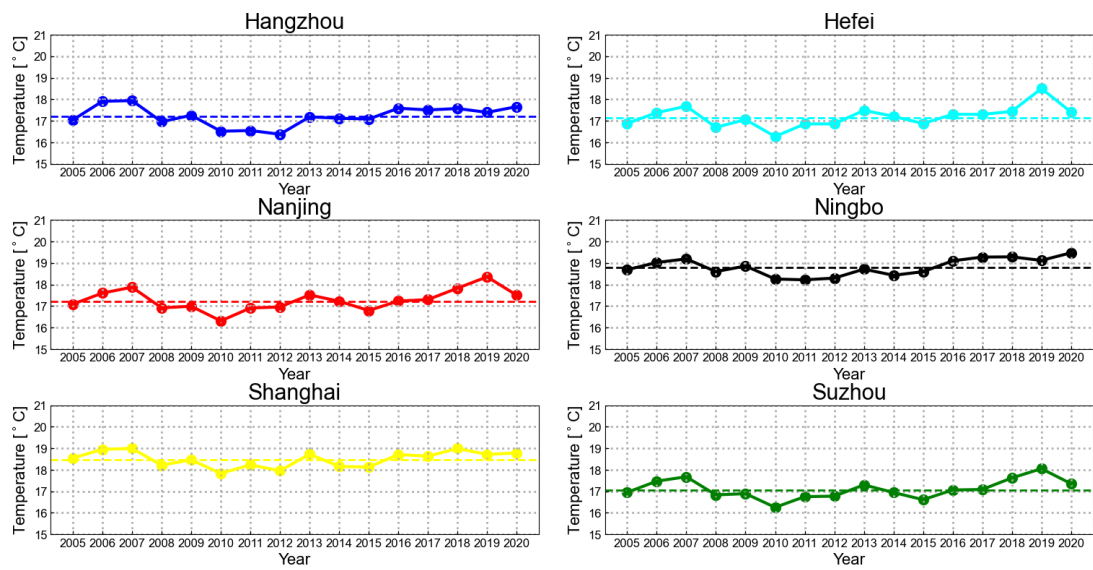

**Figure S8.** The annual average of surface temperature in main cities over YRD during 2005-2020.

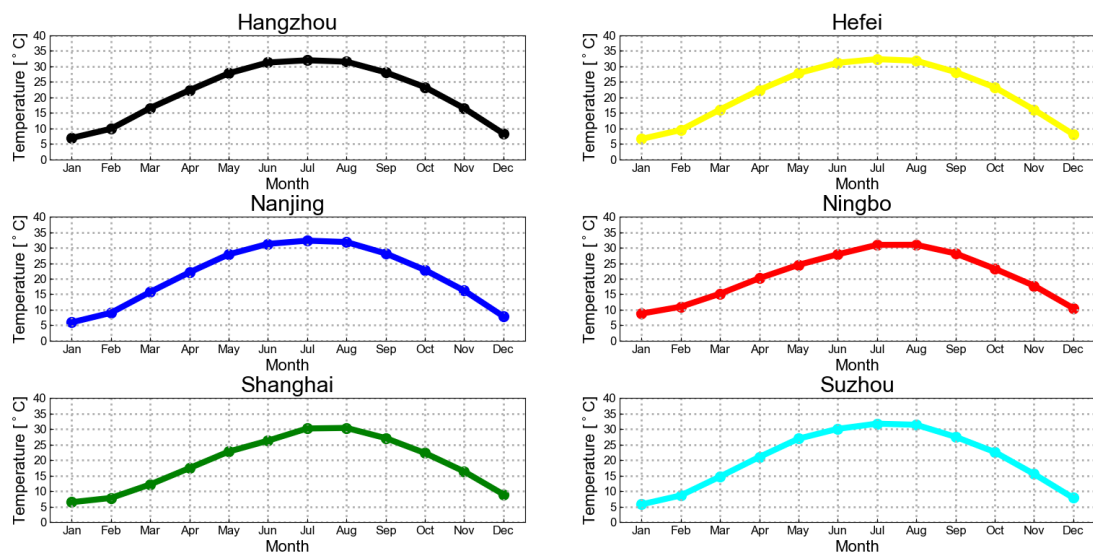

**Figure S9.** The monthly average of surface temperature in main cities over YRD during 2005-2020.

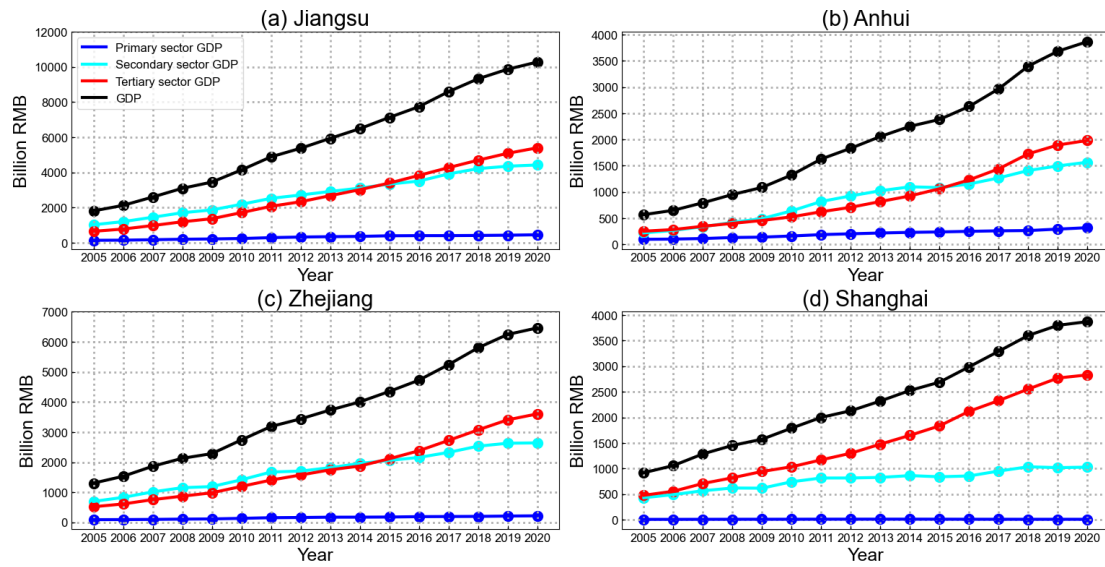

**Figure S10.** The value of GDP for total (black dots and lines), primary sector (blue dots and lines), secondary sector (cyan dots and lines) and tertiary sector (red dots and lines), in Jiangsu Province from 2006 to 2020, Anhui Province, Zhejiang Province and Shanghai city, respectively.

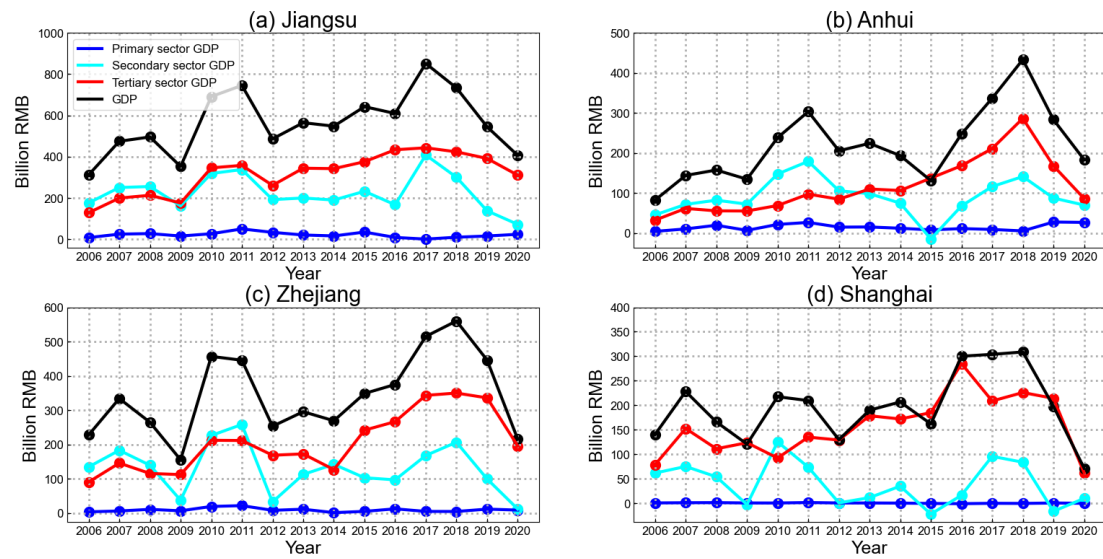

**Figure S11.** Time series of year-to-year increment in GDP, i.e., the increase in GDP at a given year relative to its previous year, over Jiangsu Province, Anhui Province, Zhejiang Province, and Shanghai within the YRD from 2006 to 2020. GDP for total, primary sector, secondary sector, and tertiary sector are marked with black, blue, cyan, and red dots/lines, respectively.

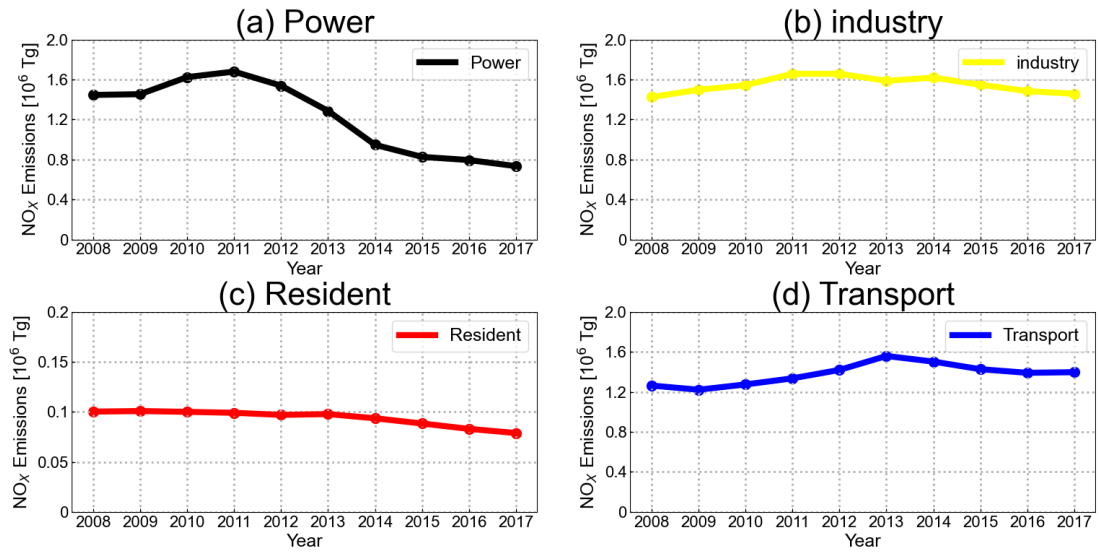

**Figure S12.** Each categories NO<sub>x</sub> emissions including motor vehicle emissions, major industrial emissions, resident emissions and power emissions from 2008 to 2017 which are extracted by MEIC inventory (<http://meicmodel.org>, last accessed: February 25, 2022) over YRD region.
